# Supplementary material
Source: bioRxiv or medRxiv preprint supplement (https://medrxiv.org/highwire/filestream/89472/field_highwire_adjunct_files/0/2020.07.13.20152025-1.pdf)

## Supplementary Material

**Supplementary Figure 1.** Distribution of baseline plasma p-tau181 levels. Enclosed in red circles are the 4 outlier measurements (121, 124, 148, and 451 pg/ml) that were excluded from analyses.

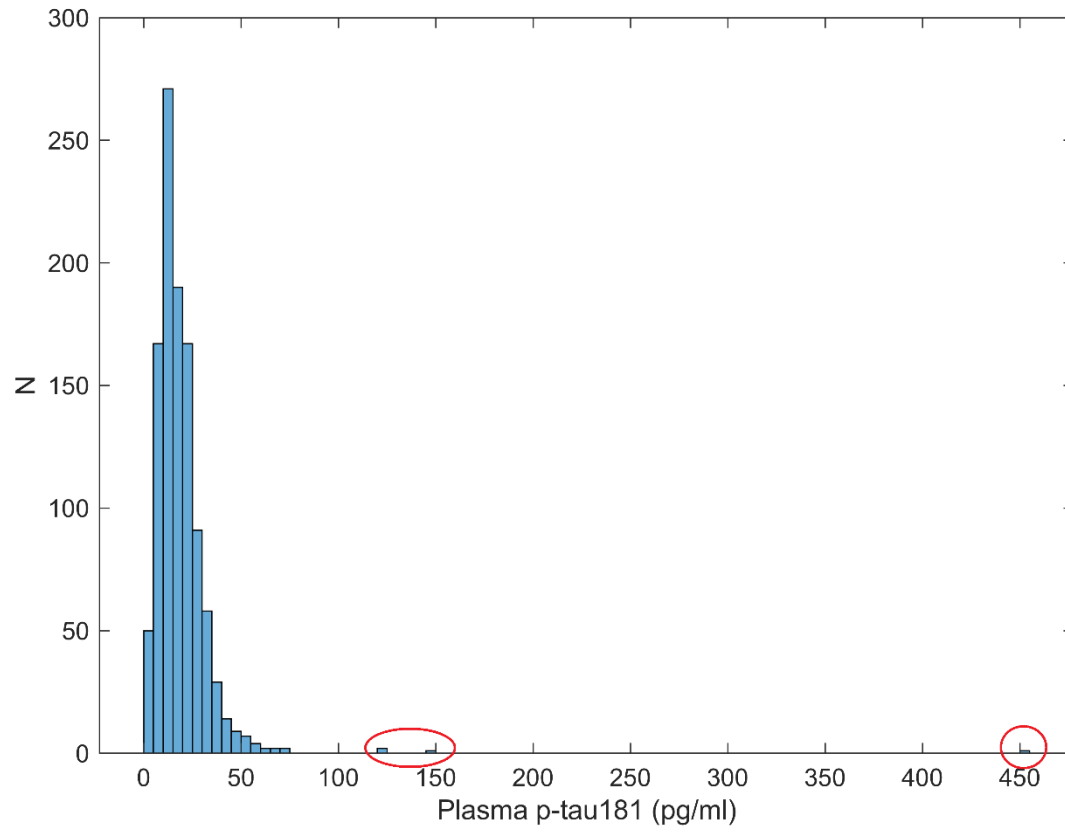

**Supplementary Figure 2.** Axial slices showing association maps in the striatum between baseline plasma p-tau181 and baseline FTP SUVR for CN, MCI, and Alzheimer's disease dementia participants. Models were adjusted for age and sex.

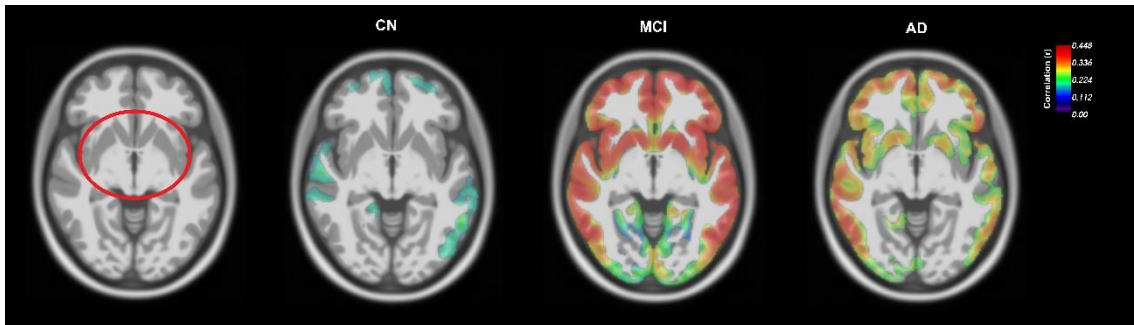

**Supplementary Figure 3.** Axial slices showing association maps in the striatum between FTB SUVR change and A) baseline plasma p-tau181, B) plasma p-tau181 change. Models were adjusted for age and sex.

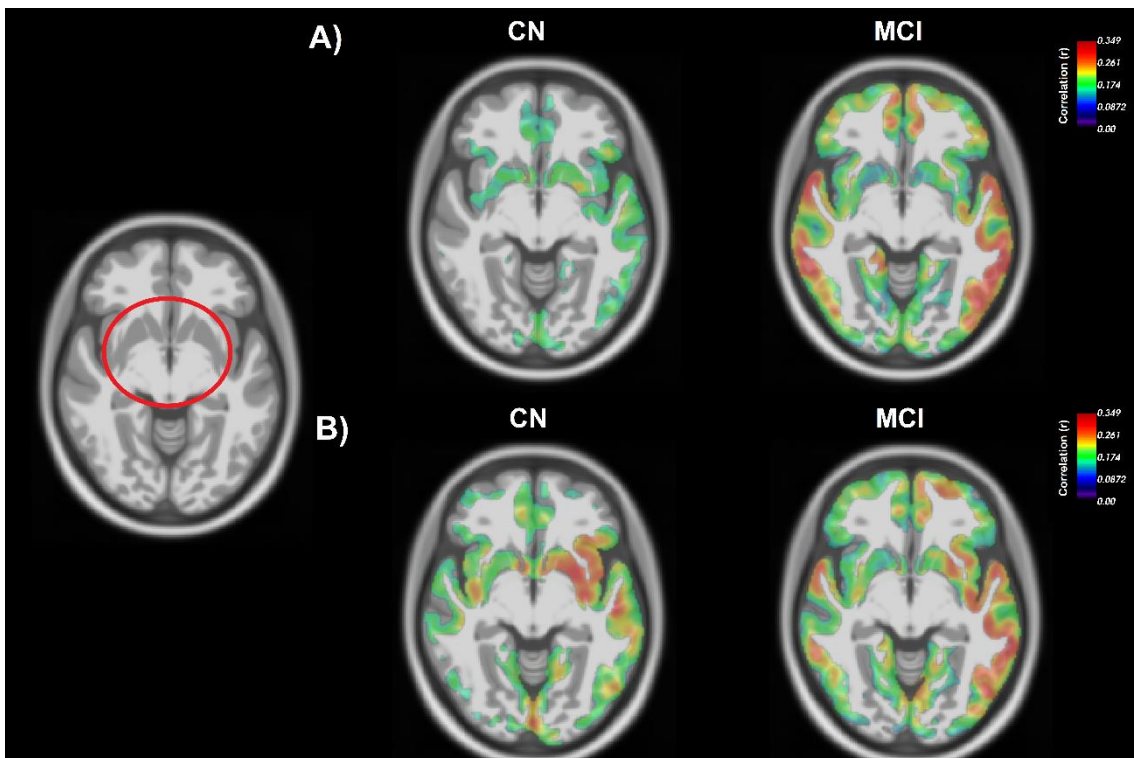

Supplement: Supplementary file [file 2020.07.13.20152025-1.pdf]
